# Supplementary material for: Enhanced identification of significant regulators of gene expression
Source: BMC Bioinformatics. 2020 Apr 6;21:134. doi: 10.1186/s12859-020-3468-z (PMC7132893; doi:10.1186/s12859-020-3468-z)
Supplement: Supplementary file 1 — Additional file 1. Gene lists with PubMed statistics. [file 12859_2020_3468_MOESM1_ESM.xlsx]

## Sheet: TFs
Transcription factors				Present (1/0)				Total				Cancer				Prostate
	# total	# w/ cancer	# w/ prostate	Pearson	Spearman	Fisher	Sobolev	Pearson	Spearman	Fisher	Sobolev	Pearson	Spearman	Fisher	Sobolev	Pearson	Spearman	Fisher	Sobolev
NDN	232	43	1	1	1	0	0	232	232	0	0	43	43	0	0	1	1	0	0
TGFB1I1	166	68	27	1	1	1	1	166	166	166	166	68	68	68	68	27	27	27	27
PTRF	180	44	12	1	1	1	1	180	180	180	180	44	44	44	44	12	12	12	12
HIF3A	142	37	2	1	1	1	1	142	142	142	142	37	37	37	37	2	2	2	2
HLF	835	295	5	1	0	1	1	835	0	835	835	295	0	295	295	5	0	5	5
KANK2	16	4	0	1	1	1	1	16	16	16	16	4	4	4	4	0	0	0	0
JAZF1	180	99	20	1	0	1	0	180	0	180	0	99	0	99	0	20	0	20	0
MYOCD	110	8	2	1	1	1	1	110	110	110	110	8	8	8	8	2	2	2	2
PITX3	425	30	2	1	1	0	0	425	425	0	0	30	30	0	0	2	2	0	0
MYOG	1064	141	0	1	1	0	0	1064	1064	0	0	141	141	0	0	0	0	0	0
PAX7	1460	286	2	1	0	0	0	1460	0	0	0	286	0	0	0	2	0	0	0
ASB11	37	2	0	1	0	0	0	37	0	0	0	2	0	0	0	0	0	0	0
ASB15	10	0	0	1	0	0	0	10	0	0	0	0	0	0	0	0	0	0	0
MYF6	113	19	0	1	0	0	0	113	0	0	0	19	0	0	0	0	0	0	0
VGLL2	94	1	0	1	0	0	0	94	0	0	0	1	0	0	0	0	0	0	0
NFATC4	200	23	1	0	1	0	0	0	200	0	0	0	23	0	0	0	1	0	0
ZNF423	42	21	0	0	1	0	1	0	42	0	42	0	21	0	21	0	0	0	0
VGL	20	4	0	0	1	0	0	0	20	0	0	0	4	0	0	0	0	0	0
TRIM31	22	13	0	0	0	1	0	0	0	22	0	0	0	13	0	0	0	0	0
PPARG	1327	276	17	0	0	1	0	0	0	1327	0	0	0	276	0	0	0	17	0
AHR	13893	2353	179	0	0	1	1	0	0	13893	13893	0	0	2353	2353	0	0	179	179
KLF5	512	239	28	0	0	1	0	0	0	512	0	0	0	239	0	0	0	28	0
ZEB1	1895	1533	105	1	0	1	1	1895	0	1895	1895	1533	0	1533	1533	105	0	105	105
LMO4	161	60	1	1	1	1	1	161	161	161	161	60	60	60	60	1	1	1	1
ASB12	2	0	0	0	0	1	1	0	0	2	2	0	0	0	0	0	0	0	0
PRDM16	432	107	1	0	0	1	1	0	0	432	432	0	0	107	107	0	0	1	1
PAX2	1355	319	23	0	0	1	0	0	0	1355	0	0	0	319	0	0	0	23	0
MYF5	1073	107	0	0	0	1	0	0	0	1073	0	0	0	107	0	0	0	0	0
GLIS1	35	6	0	0	0	0	1	0	0	0	35	0	0	0	6	0	0	0	0
TWIST2	216	112	5	0	0	0	1	0	0	0	216	0	0	0	112	0	0	0	5
EYA4	94	37	0	0	0	0	1	0	0	0	94	0	0	0	37	0	0	0	0
Sum	26343	6287	433	17	12	17	15	7120	2758	22301	18219	2670	483	5562	4685	179	48	422	339
Average	849.774	202.806	13.9677					418.824	229.833	1311.82	1214.6	157.059	40.25	327.176	312.333	10.5294	4	24.8235	22.6
Ratio								0.492864	0.270464	1.54373	1.42932	0.774427	0.198465	1.61324	1.54006	0.753838	0.286374	1.7772	1.61801

## Sheet: EFs
Epigenetic factors				Present (1/0)				Total				Cancer				Prostate
	# total	# w/ cancer	# w/ prostate	Pearson	Spearman	Fisher	Sobolev	Pearson	Spearman	Fisher	Sobolev	Pearson	Spearman	Fisher	Sobolev	Pearson	Spearman	Fisher	Sobolev
ZNF516	13	6	0	1	0	1	1	13	0	13	13	6	0	6	6	0	0	0	0
PRKCA	1124	454	28	1	0	1	0	1124	0	1124	0	454	0	454	0	28	0	28	0
ASXL3	41	17	2	1	1	1	1	41	41	41	41	17	17	17	17	2	2	2	2
PRKCB	105	45	0	1	1	1	0	105	105	105	0	45	45	45	0	0	0	0	0
EYA1	309	39	0	1	1	1	1	309	309	309	309	39	39	39	39	0	0	0	0
ZBTB7C	12	5	0	1	0	1	0	12	0	12	0	5	0	5	0	0	0	0	0
APOBEC2	59	15	0	1	0	0	0	59	0	0	0	15	0	0	0	0	0	0	0
PRKAG3	123	8	0	1	1	0	0	123	123	0	0	8	8	0	0	0	0	0	0
PADI1	12	1	0	0	1	1	1	0	12	12	12	0	1	1	1	0	0	0	0
PADI3	17	2	0	0	1	1	1	0	17	17	17	0	2	2	2	0	0	0	0
APOBEC3G	983	147	6	0	1	1	1	0	983	983	983	0	147	147	147	0	6	6	6
PIWIL4	69	23	0	0	1	0	0	0	69	0	0	0	23	0	0	0	0	0	0
ERBB4	1850	915	40	0	1	0	1	0	1850	0	1850	0	915	0	915	0	40	0	40
CDK1	3857	1986	119	0	0	1	0	0	0	3857	0	0	0	1986	0	0	0	119	0
AURKA	1426	1152	63	0	0	1	1	0	0	1426	1426	0	0	1152	1152	0	0	63	63
RAD54L	121	62	3	0	0	1	1	0	0	121	121	0	0	62	62	0	0	3	3
TOP2A	7187	3165	76	0	0	1	1	0	0	7187	7187	0	0	3165	3165	0	0	76	76
AURKB	981	575	22	0	0	0	1	0	0	0	981	0	0	0	575	0	0	0	22
HJURP	87	41	0	0	0	0	1	0	0	0	87	0	0	0	41	0	0	0	0
ASF1B	57	15	1	0	0	0	1	0	0	0	57	0	0	0	15	0	0	0	1
BUB1	940	512	14	0	0	0	1	0	0	0	940	0	0	0	512	0	0	0	14
ANP32E	33	17	1	0	0	1	1	0	0	33	33	0	0	17	17	0	0	1	1
Sum	19406	9202	375	8	9	14	15	1786	3509	15240	14057	589	1197	7098	6666	30	48	298	228
Average	882.091	418.273	17.0455					223.25	389.889	1088.57	937.133	73.625	133	507	444.4	3.75	5.33333	21.2857	15.2
Ratio								0.253092	0.442005	1.23408	1.0624	0.176022	0.317974	1.21213	1.06246	0.22	0.312889	1.24876	0.891733

## Sheet: lncRNAs
lncRNAs	Present (1/0)
	Pearson	Spearman	Fisher	Sobolev
ENSG00000175699	1
ENSG00000185847	1	1
ENSG00000223382	1		1
ENSG00000225986		1
ENSG00000230500		1
ENSG00000232685			1
ENSG00000232855				1
ENSG00000233117	1
ENSG00000236208	1
ENSG00000239922			1
ENSG00000240045	1
ENSG00000241158			1
ENSG00000242207		1
ENSG00000245025	1			1
ENSG00000248890	1		1	1
ENSG00000250734	1		1
ENSG00000250874			1
ENSG00000251081	1
ENSG00000253115	1
ENSG00000253549		1
ENSG00000253967				1
ENSG00000254510		1
ENSG00000255248	1		1
ENSG00000255427			1
ENSG00000258441				1
ENSG00000258444			1
ENSG00000263065	1		1	1
ENSG00000263489	1	1
ENSG00000264151			1
ENSG00000267082	1	1	1	1
ENSG00000267405	1		1
ENSG00000268388				1
ENSG00000269797			1
Sum	16	8	15	8
