# Supplementary material for: Enhanced identification of significant regulators of gene expression
Source: BMC Bioinformatics. 2020 Apr 6;21:134. doi: 10.1186/s12859-020-3468-z (PMC7132893; doi:10.1186/s12859-020-3468-z)
Supplement: Supplementary file 2 — Additional file 2. Gene sets used for enrichment analysis. [file 12859_2020_3468_MOESM2_ESM.xlsx]

## Sheet: TFs
TF	Pearson	Spearman	Fisher	Sobolev	COSMIC (723)	Hart	Bailey (299)
TGFB1I1	1	1	1	1	0	0	0
PTRF	1	1	1	1	0	0	0
HIF3A	1	1	1	1	0	0	0
KANK2	1	1	1	1	0	0	0
MYOCD	1	1	1	1	0	0	0
LMO4	1	1	1	1	0	0	0
HLF	1	0	1	1	1	0	0
ZEB1	1	0	1	1	1	0	0
AHR	0	0	1	1	0	0	0
ASB12	0	0	1	1	0	0	0
PRDM16	0	0	1	1	1	0	0
ZNF423	0	1	0	1	0	0	0
GLIS1	0	0	0	1	0	0	0
TWIST2	0	0	0	1	0	0	0
EYA4	0	0	0	1	0	0	0
JAZF1	1	0	1	0	1	0	0
TRIM31	0	0	1	0	0	0	0
PPARG	0	0	1	0	1	0	0
KLF5	0	0	1	0	0	0	1
PAX2	0	0	1	0	0	0	0
MYF5	0	0	1	0	0	0	0
NDN	1	1	0	0	0	0	0
PITX3	1	1	0	0	0	0	0
MYOG	1	1	0	0	0	0	0
NFATC4	0	1	0	0	0	0	0
VGL	0	1	0	0	0	0	0
PAX7	1	0	0	0	1	0	0
ASB11	1	0	0	0	0	0	0
ASB15	1	0	0	0	0	0	0
MYF6	1	0	0	0	0	0	0
VGLL2	1	0	0	0	0	0	0
HR	1	0	1	0	0	0	0

## Sheet: EFs
EF	Pearson	Spearman	Fisher	Sobolev	COSMIC (723)	Hart (684)	Bailey (299)
ASXL3	1	1	1	1	0	0	0
EYA1	1	1	1	1	0	0	0
PADI1	0	1	1	1	0	0	0
PADI3	0	1	1	1	0	0	0
APOBEC3G	0	1	1	1	0	0	0
ZNF516	1	0	1	1	0	0	0
AURKA	0	0	1	1	0	0	0
RAD54L	0	0	1	1	0	0	0
TOP2A	0	0	1	1	0	1	0
ANP32E	0	0	1	1	0	0	0
ERBB4	0	1	0	1	1	0	1
AURKB	0	0	0	1	0	1	0
HJURP	0	0	0	1	0	1	0
ASF1B	0	0	0	1	0	0	0
BUB1	0	0	0	1	0	0	0
PRKCB	1	1	1	0	1	0	0
PRKCA	1	0	1	0	0	0	0
ZBTB7C	1	0	1	0	0	0	0
CDK1	0	0	1	0	0	1	0
PRKAG3	1	1	0	0	0	0	0
PIWIL4	0	1	0	0	0	0	0
APOBEC2	1	0	0	0	0	0	0

## Sheet: lncRNAs
lncRNA	Pearson	Spearman	Fisher	Sobolev
ENSG00000267082	1	1	1	1
ENSG00000248890	1		1	1
ENSG00000263065	1		1	1
ENSG00000245025	1			1
ENSG00000232855				1
ENSG00000253967				1
ENSG00000258441				1
ENSG00000268388				1
ENSG00000223382	1		1
ENSG00000250734	1		1
ENSG00000255248	1		1
ENSG00000267405	1		1
ENSG00000232685			1
ENSG00000239922			1
ENSG00000241158			1
ENSG00000250874			1
ENSG00000255427			1
ENSG00000258444			1
ENSG00000264151			1
ENSG00000269797			1
ENSG00000185847	1	1
ENSG00000263489	1	1
ENSG00000225986		1
ENSG00000230500		1
ENSG00000242207		1
ENSG00000253549		1
ENSG00000254510		1
ENSG00000175699	1
ENSG00000233117	1
ENSG00000236208	1
ENSG00000240045	1
ENSG00000251081	1
ENSG00000253115	1

## Sheet: Individual
Pearson	Spearman	Fisher	Sobolev		Pearson	Spearman	Fisher	Sobolev		Pearson	Spearman	Fisher	Sobolev
NDN	NDN	TGFB1I1	TGFB1I1		ZNF516	ASXL3	ASXL3	ASXL3		ENSG00000175699	ENSG00000185847	ENSG00000267082	ENSG00000267082
TGFB1I1	TGFB1I1	PTRF	PTRF		PRKCA	PRKCB	PRKCB	EYA1		ENSG00000185847	ENSG00000263489	ENSG00000223382	ENSG00000248890
PTRF	PTRF	HIF3A	HIF3A		ASXL3	EYA1	EYA1	PADI1		ENSG00000223382	ENSG00000267082	ENSG00000248890	ENSG00000263065
HIF3A	HIF3A	KANK2	KANK2		PRKCB	PRKAG3	PADI1	PADI3		ENSG00000233117	ENSG00000225986	ENSG00000250734	ENSG00000245025
HLF	KANK2	MYOCD	MYOCD		EYA1	PADI1	PADI3	APOBEC3G		ENSG00000236208	ENSG00000230500	ENSG00000255248	ENSG00000232855
KANK2	MYOCD	LMO4	LMO4		ZBTB7C	PADI3	APOBEC3G	ZNF516		ENSG00000240045	ENSG00000242207	ENSG00000263065	ENSG00000253967
JAZF1	PITX3	HLF	HLF		APOBEC2	APOBEC3G	ZNF516	AURKA		ENSG00000245025	ENSG00000253549	ENSG00000267405	ENSG00000258441
MYOCD	MYOG	JAZF1	ZEB1		PRKAG3	PIWIL4	PRKCA	RAD54L		ENSG00000248890	ENSG00000254510	ENSG00000232685	ENSG00000268388
PITX3	LMO4	ZEB1	AHR			ERBB4	ZBTB7C	TOP2A		ENSG00000250734		ENSG00000239922
MYOG	NFATC4	TRIM31	ASB12				CDK1	ANP32E		ENSG00000251081		ENSG00000241158
PAX7	ZNF423	PPARG	PRDM16				AURKA	ERBB4		ENSG00000253115		ENSG00000250874
ASB11	VGL	AHR	ZNF423				RAD54L	AURKB		ENSG00000255248		ENSG00000255427
ASB15		KLF5	GLIS1				TOP2A	HJURP		ENSG00000263065		ENSG00000258444
MYF6		ASB12	TWIST2				ANP32E	ASF1B		ENSG00000263489		ENSG00000264151
VGLL2		PRDM16	EYA4					BUB1		ENSG00000267082		ENSG00000269797
ZEB1		PAX2								ENSG00000267405
LMO4		MYF5
HR		HR

## Sheet: TFs_EFs
Pearson	Spearman	Fisher	Sobolev
NDN	NDN	TGFB1I1	TGFB1I1
TGFB1I1	TGFB1I1	PTRF	PTRF
PTRF	PTRF	HIF3A	HIF3A
HIF3A	HIF3A	KANK2	KANK2
HLF	KANK2	MYOCD	MYOCD
KANK2	MYOCD	LMO4	LMO4
JAZF1	PITX3	HLF	HLF
MYOCD	MYOG	JAZF1	ZEB1
PITX3	LMO4	ZEB1	AHR
MYOG	NFATC4	TRIM31	ASB12
PAX7	ZNF423	PPARG	PRDM16
ASB11	VGL	AHR	ZNF423
ASB15	ASXL3	KLF5	GLIS1
MYF6	PRKCB	ASB12	TWIST2
VGLL2	EYA1	PRDM16	EYA4
ZEB1	PRKAG3	PAX2	ASXL3
LMO4	PADI1	MYF5	EYA1
ZNF516	PADI3	ASXL3	PADI1
PRKCA	APOBEC3G	PRKCB	PADI3
ASXL3	PIWIL4	EYA1	APOBEC3G
PRKCB	ERBB4	PADI1	ZNF516
EYA1		PADI3	AURKA
ZBTB7C		APOBEC3G	RAD54L
APOBEC2		ZNF516	TOP2A
PRKAG3		PRKCA	ANP32E
HR		ZBTB7C	ERBB4
		CDK1	AURKB
		AURKA	HJURP
		RAD54L	ASF1B
		TOP2A	BUB1
		ANP32E
		HR

## Sheet: All
Pearson	Spearman	Fisher	Sobolev
NDN	NDN	TGFB1I1	TGFB1I1
TGFB1I1	TGFB1I1	PTRF	PTRF
PTRF	PTRF	HIF3A	HIF3A
HIF3A	HIF3A	KANK2	KANK2
HLF	KANK2	MYOCD	MYOCD
KANK2	MYOCD	LMO4	LMO4
JAZF1	PITX3	HLF	HLF
MYOCD	MYOG	JAZF1	ZEB1
PITX3	LMO4	ZEB1	AHR
MYOG	NFATC4	TRIM31	ASB12
PAX7	ZNF423	PPARG	PRDM16
ASB11	VGL	AHR	ZNF423
ASB15	ASXL3	KLF5	GLIS1
MYF6	PRKCB	ASB12	TWIST2
VGLL2	EYA1	PRDM16	EYA4
ZEB1	PRKAG3	PAX2	ASXL3
LMO4	PADI1	MYF5	EYA1
ZNF516	PADI3	ASXL3	PADI1
PRKCA	APOBEC3G	PRKCB	PADI3
ASXL3	PIWIL4	EYA1	APOBEC3G
PRKCB	ERBB4	PADI1	ZNF516
EYA1	ENSG00000185847	PADI3	AURKA
ZBTB7C	ENSG00000263489	APOBEC3G	RAD54L
APOBEC2	ENSG00000267082	ZNF516	TOP2A
PRKAG3	ENSG00000225986	PRKCA	ANP32E
HR	ENSG00000230500	ZBTB7C	ERBB4
ENSG00000175699	ENSG00000242207	CDK1	AURKB
ENSG00000185847	ENSG00000253549	AURKA	HJURP
ENSG00000223382	ENSG00000254510	RAD54L	ASF1B
ENSG00000233117		TOP2A	BUB1
ENSG00000236208		ANP32E	ENSG00000267082
ENSG00000240045		HR	ENSG00000248890
ENSG00000245025		ENSG00000267082	ENSG00000263065
ENSG00000248890		ENSG00000223382	ENSG00000245025
ENSG00000250734		ENSG00000248890	ENSG00000232855
ENSG00000251081		ENSG00000250734	ENSG00000253967
ENSG00000253115		ENSG00000255248	ENSG00000258441
ENSG00000255248		ENSG00000263065	ENSG00000268388
ENSG00000263065		ENSG00000267405
ENSG00000263489		ENSG00000232685
ENSG00000267082		ENSG00000239922
ENSG00000267405		ENSG00000241158
		ENSG00000250874
		ENSG00000255427
		ENSG00000258444
		ENSG00000264151
		ENSG00000269797
