# Supplementary material for: Enhanced identification of significant regulators of gene expression
Source: BMC Bioinformatics. 2020 Apr 6;21:134. doi: 10.1186/s12859-020-3468-z (PMC7132893; doi:10.1186/s12859-020-3468-z)
Supplement: Supplementary file 3 — Additional file 3. Identifiers for TCGA datasets on prostate cancer as downloaded from the GDC data portal. [file 12859_2020_3468_MOESM3_ESM.xlsx]

## Sheet: gdc_sample_sheet.2018-08-14
File ID	File Name	Data Category	Data Type	Project ID	Case ID	Sample ID	Sample Type
9bf3c813-f17f-4fa5-8bfa-1c3d9679654a	f950e572-3faa-4ee3-ba56-da53e1476fa7.htseq.counts.gz	Transcriptome Profiling	Gene Expression Quantification	TCGA-PRAD	TCGA-CH-5761	TCGA-CH-5761-01A	Primary Tumor
d58f1c61-268e-45df-a682-b8ece61e68bb	b6fd2d99-73d8-4881-a03c-fdc3c47cbd12.htseq.counts.gz	Transcriptome Profiling	Gene Expression Quantification	TCGA-PRAD	TCGA-CH-5761	TCGA-CH-5761-11A	Solid Tissue Normal
7ed05ceb-df5f-4d0a-bb9c-ddb0a3ee66d6	ff052832-df71-405d-9cc9-8e1f55f65610.htseq.counts.gz	Transcriptome Profiling	Gene Expression Quantification	TCGA-PRAD	TCGA-CH-5767	TCGA-CH-5767-01A	Primary Tumor
7ac4a71e-636a-4640-9aed-997b882e1a80	5e480597-1410-4c25-bc82-6712d2743187.htseq.counts.gz	Transcriptome Profiling	Gene Expression Quantification	TCGA-PRAD	TCGA-CH-5767	TCGA-CH-5767-11B	Solid Tissue Normal
c9f88dd9-82a9-429d-9ad3-e49e6b443b7a	af6221a1-30ba-4501-914f-393a07cc6594.htseq.counts.gz	Transcriptome Profiling	Gene Expression Quantification	TCGA-PRAD	TCGA-CH-5768	TCGA-CH-5768-01A	Primary Tumor
eb59b97e-effe-40c6-a582-7bea00a42d83	9d6e58fa-a1b1-4e82-96fe-d3d91528722e.htseq.counts.gz	Transcriptome Profiling	Gene Expression Quantification	TCGA-PRAD	TCGA-CH-5768	TCGA-CH-5768-11A	Solid Tissue Normal
4fdd0eca-6742-4348-aa12-c4bddfb86dd9	ecff0d66-7705-4671-9d00-99eced84c7d1.htseq.counts.gz	Transcriptome Profiling	Gene Expression Quantification	TCGA-PRAD	TCGA-CH-5769	TCGA-CH-5769-01A	Primary Tumor
5196a59c-0bd1-4d9f-a02f-69a8315f4aad	81ef037f-28d3-4960-b814-37af7ff8f972.htseq.counts.gz	Transcriptome Profiling	Gene Expression Quantification	TCGA-PRAD	TCGA-CH-5769	TCGA-CH-5769-11A	Solid Tissue Normal	Normal tissue contains tumor
3dab985c-8f86-4ef7-9187-64e2b7eaf009	1530a60d-78d0-4ce6-8959-40080184f716.htseq.counts.gz	Transcriptome Profiling	Gene Expression Quantification	TCGA-PRAD	TCGA-EJ-7115	TCGA-EJ-7115-01A	Primary Tumor
e6dbe569-0e7a-4fb2-8707-3be12f0cf33a	4a8849c2-9e21-4ccf-b703-b6d6311744e0.htseq.counts.gz	Transcriptome Profiling	Gene Expression Quantification	TCGA-PRAD	TCGA-EJ-7115	TCGA-EJ-7115-11A	Solid Tissue Normal	Normal tissue contains tumor
64a2171e-b53f-47f5-aa9c-2b08cc9fd476	cf98581e-c0bf-4224-9862-6f4c5c18d7e8.htseq.counts.gz	Transcriptome Profiling	Gene Expression Quantification	TCGA-PRAD	TCGA-EJ-7123	TCGA-EJ-7123-01A	Primary Tumor	Prior malignancy basal cell carcinoma of the nose. No systemic chemotherapy or radiation.
068af932-2cb0-4f7c-b4bd-42ebbea91d58	497d8716-c8a0-4b3d-b0ec-b491f0f056cd.htseq.counts.gz	Transcriptome Profiling	Gene Expression Quantification	TCGA-PRAD	TCGA-EJ-7123	TCGA-EJ-7123-11A	Solid Tissue Normal	Prior malignancy basal cell carcinoma of the nose. No systemic chemotherapy or radiation.
09be745b-ea94-4f93-a3fb-26a2b6b8f6d6	f8032464-fd4f-4927-8f28-d0fc90e35669.htseq.counts.gz	Transcriptome Profiling	Gene Expression Quantification	TCGA-PRAD	TCGA-EJ-7314	TCGA-EJ-7314-01A	Primary Tumor
e8a1ac0a-1400-4fa9-85c2-4c3d059e0091	e3ed758e-6842-45dd-9048-82cf7a7be5b2.htseq.counts.gz	Transcriptome Profiling	Gene Expression Quantification	TCGA-PRAD	TCGA-EJ-7314	TCGA-EJ-7314-11A	Solid Tissue Normal
8f2934ac-cd72-48ab-b299-319d017f3c51	e32272e5-a64e-482b-bb3e-b82542a643e3.htseq.counts.gz	Transcriptome Profiling	Gene Expression Quantification	TCGA-PRAD	TCGA-EJ-7317	TCGA-EJ-7317-01A	Primary Tumor
ac9b5b1c-5652-47db-aa97-16236e34fab4	f42ef7e5-39e3-4a91-b8bb-11a38d24c72b.htseq.counts.gz	Transcriptome Profiling	Gene Expression Quantification	TCGA-PRAD	TCGA-EJ-7317	TCGA-EJ-7317-11A	Solid Tissue Normal
23fd2920-d6ed-4291-ab3c-39fd14f4aee9	d3f4a547-c742-4ed5-9cee-227735f77891.htseq.counts.gz	Transcriptome Profiling	Gene Expression Quantification	TCGA-PRAD	TCGA-EJ-7330	TCGA-EJ-7330-01A	Primary Tumor
6cf23290-1888-4398-8585-76d06efa261f	913e6383-a422-4429-8385-c5ad8d90386c.htseq.counts.gz	Transcriptome Profiling	Gene Expression Quantification	TCGA-PRAD	TCGA-EJ-7330	TCGA-EJ-7330-11A	Solid Tissue Normal
097d11d3-f77b-4ee1-9bdf-c6ff5c807e97	494ca558-baef-4580-9662-19f2b8527858.htseq.counts.gz	Transcriptome Profiling	Gene Expression Quantification	TCGA-PRAD	TCGA-EJ-7781	TCGA-EJ-7781-01A	Primary Tumor
aa0de4fa-8488-4602-be00-4dfe06c1c4e0	06f6022f-d28b-4c80-ac20-ee5923b5e0b5.htseq.counts.gz	Transcriptome Profiling	Gene Expression Quantification	TCGA-PRAD	TCGA-EJ-7781	TCGA-EJ-7781-11A	Solid Tissue Normal
b9cc48af-80c8-44f3-8e3e-29fafee0e675	640827e7-e319-4b34-a59b-485ef92cdc66.htseq.counts.gz	Transcriptome Profiling	Gene Expression Quantification	TCGA-PRAD	TCGA-EJ-7782	TCGA-EJ-7782-01A	Primary Tumor
f6a25cbf-8700-4232-9eac-dd38270dc8d4	8c36062e-bf1d-4d6c-be76-37d9fd4805bc.htseq.counts.gz	Transcriptome Profiling	Gene Expression Quantification	TCGA-PRAD	TCGA-EJ-7782	TCGA-EJ-7782-11A	Solid Tissue Normal
65ab8e33-937e-4e7e-9af8-2acd7a529c32	208eb16b-3ed5-4cfe-823d-0da9af5ba913.htseq.counts.gz	Transcriptome Profiling	Gene Expression Quantification	TCGA-PRAD	TCGA-EJ-7784	TCGA-EJ-7784-01A	Primary Tumor
d8cd957c-035f-4555-87d4-d674fd4de755	8a69e294-e600-432c-8900-cf8f650a8319.htseq.counts.gz	Transcriptome Profiling	Gene Expression Quantification	TCGA-PRAD	TCGA-EJ-7784	TCGA-EJ-7784-11A	Solid Tissue Normal
1c43e621-dd68-40b4-8174-e294429b3814	619af800-bb88-4a0b-9a4b-0259a0f99ff3.htseq.counts.gz	Transcriptome Profiling	Gene Expression Quantification	TCGA-PRAD	TCGA-G9-6348	TCGA-G9-6348-01A	Primary Tumor
984627d8-e10c-4500-b66f-c9ed82749b83	a5f5e1b6-9947-442f-a106-9df71b3a2e75.htseq.counts.gz	Transcriptome Profiling	Gene Expression Quantification	TCGA-PRAD	TCGA-G9-6348	TCGA-G9-6348-11A	Solid Tissue Normal
453593ea-4396-44c7-bdc0-e74dcb2f2656	edc8824b-e337-47be-8f6e-9a7516e69df0.htseq.counts.gz	Transcriptome Profiling	Gene Expression Quantification	TCGA-PRAD	TCGA-G9-6362	TCGA-G9-6362-01A	Primary Tumor
cef8adf5-b21d-4fb1-8936-c0859fd7955f	b7aa2312-9946-4dc5-a844-7e1cf249e284.htseq.counts.gz	Transcriptome Profiling	Gene Expression Quantification	TCGA-PRAD	TCGA-G9-6362	TCGA-G9-6362-11A	Solid Tissue Normal	Normal tissue contains tumor
9a4e5e06-b42d-4da1-b11f-706e0213c3a2	20c34cc9-31cd-44f9-9288-a059ffafebb8.htseq.counts.gz	Transcriptome Profiling	Gene Expression Quantification	TCGA-PRAD	TCGA-G9-6363	TCGA-G9-6363-01A	Primary Tumor
a966e532-0cc5-4efa-bfbb-b0edfb18920b	d84aecda-2187-40e3-b2b5-2bb18e735ef2.htseq.counts.gz	Transcriptome Profiling	Gene Expression Quantification	TCGA-PRAD	TCGA-G9-6363	TCGA-G9-6363-11A	Solid Tissue Normal	Normal tissue contains tumor
06a88218-698d-43c9-b55c-830ce007fd4f	443da90b-2658-4864-aede-3dcea543cf74.htseq.counts.gz	Transcriptome Profiling	Gene Expression Quantification	TCGA-PRAD	TCGA-G9-6496	TCGA-G9-6496-01A	Primary Tumor
a608094f-f3cc-410e-be5d-49e455c71d6f	0622c348-1f05-4f21-8486-d5bb9399f7be.htseq.counts.gz	Transcriptome Profiling	Gene Expression Quantification	TCGA-PRAD	TCGA-G9-6496	TCGA-G9-6496-11A	Solid Tissue Normal
7a9d8fe3-0ddb-467a-941d-dae8909c5658	d0c8d150-3582-406e-af39-fd58f6e53290.htseq.counts.gz	Transcriptome Profiling	Gene Expression Quantification	TCGA-PRAD	TCGA-G9-6499	TCGA-G9-6499-01A	Primary Tumor
5f9c9781-cce9-4cc3-af83-098c1425e717	15e656ea-3229-42eb-be95-379527324b54.htseq.counts.gz	Transcriptome Profiling	Gene Expression Quantification	TCGA-PRAD	TCGA-G9-6499	TCGA-G9-6499-11A	Solid Tissue Normal	Normal tissue contains tumor
dd1d47a6-2081-4fdd-b887-3e4c4b71c6c6	24f1d3d7-1093-494e-9c5d-1766f421d658.htseq.counts.gz	Transcriptome Profiling	Gene Expression Quantification	TCGA-PRAD	TCGA-HC-7738	TCGA-HC-7738-01A	Primary Tumor
62bfc352-538e-4dc9-90e1-c1cf77b31858	1c3e2b57-9927-4821-9842-4c62ed8c2907.htseq.counts.gz	Transcriptome Profiling	Gene Expression Quantification	TCGA-PRAD	TCGA-HC-7738	TCGA-HC-7738-11A	Solid Tissue Normal
e317d59c-786d-44c3-a82b-4951af6e03de	2a178039-8f10-43d6-b6f5-fae66d92b6a5.htseq.counts.gz	Transcriptome Profiling	Gene Expression Quantification	TCGA-PRAD	TCGA-HC-8259	TCGA-HC-8259-01A	Primary Tumor	Upon second review, the frozen top slide used to qualify the case had no tumor.
05cbea1f-fb0b-4422-95a1-89b7bfea5f32	8cbca0d4-0cbd-47b8-8643-331c67840817.htseq.counts.gz	Transcriptome Profiling	Gene Expression Quantification	TCGA-PRAD	TCGA-HC-8259	TCGA-HC-8259-11A	Solid Tissue Normal	Upon second review, the frozen top slide used to qualify the case had no tumor.
3a97783d-9d81-4a7a-891d-cd290e004a0e	e1bf71c6-b975-456e-8b1d-309c465788ce.htseq.counts.gz	Transcriptome Profiling	Gene Expression Quantification	TCGA-PRAD	TCGA-HC-8262	TCGA-HC-8262-01A	Primary Tumor
3d677425-9b0d-40d4-bc56-567a2d63b92d	f87cd150-16db-42e7-b78a-667735956ba3.htseq.counts.gz	Transcriptome Profiling	Gene Expression Quantification	TCGA-PRAD	TCGA-HC-8262	TCGA-HC-8262-11A	Solid Tissue Normal
401840b7-432e-4957-bd00-f3f3f721c5c6	aa09a5af-44cc-4f04-9ad9-d3b0a8b6aafc.htseq.counts.gz	Transcriptome Profiling	Gene Expression Quantification	TCGA-PRAD	TCGA-J4-A83J	TCGA-J4-A83J-01A	Primary Tumor
6189d5b9-7db0-41a4-8be5-96346d5be942	7985247f-9162-420b-b09c-55c977985b1e.htseq.counts.gz	Transcriptome Profiling	Gene Expression Quantification	TCGA-PRAD	TCGA-J4-A83J	TCGA-J4-A83J-11A	Solid Tissue Normal
